# Supplementary material for: Defining an Ultra-Low Risk Group in Asymptomatic IgM Monoclonal Gammopathy
Source: MDPI journal article supplement (doi:10.3390/cancers13092055), 2021-04-23
Supplement: s1 [file s1]

**Table S1.** Association between immunoparesis and previously recognized risk factors for disease progression in asymptomatic IgM monoclonal gammopathy.

|                                    | Immunoparesis (% or CI <sup>a</sup> ) | No immunoparesis (% or CI) | P-value |
|------------------------------------|---------------------------------------|----------------------------|---------|
| Male sex                           | 5 (36%)                               | 84 (55%)                   | 0.2     |
| Hemoglobin (g/dL)                  | 13.0 (11.6–14.0)                      | 13.4 (12.5–14.8)           | 0.2     |
| Albumin (g/L)                      | 40 (39–44)                            | 43 (41–45)                 | 0.06    |
| Serum IgM (g/L)                    | 18.0 (8.4–30.5)                       | 4.9 (3.4–10.0)             | <0.001  |
| Serum M-Protein (g/L)              | 14.9 (11.1–24.0)                      | 12.7 (9.0–14.6)            | 0.01    |
| Abnormal FLC ratio <sup>b</sup>    | 4 (100%)                              | 37 (43%)                   | 0.025   |
| Lymphoplasmacytic infiltration (%) | 29 (10–54)                            | 16 (11–23)                 | 0.008   |
| <i>MYD88</i> mutation <sup>c</sup> | 7 (53%)                               | 75 (54%)                   | 0.9     |

<sup>a</sup> CI: Confidence interval; <sup>b</sup> FLC: free light chain ratio (available in 92 patients); <sup>c</sup> Available in 160 patients.

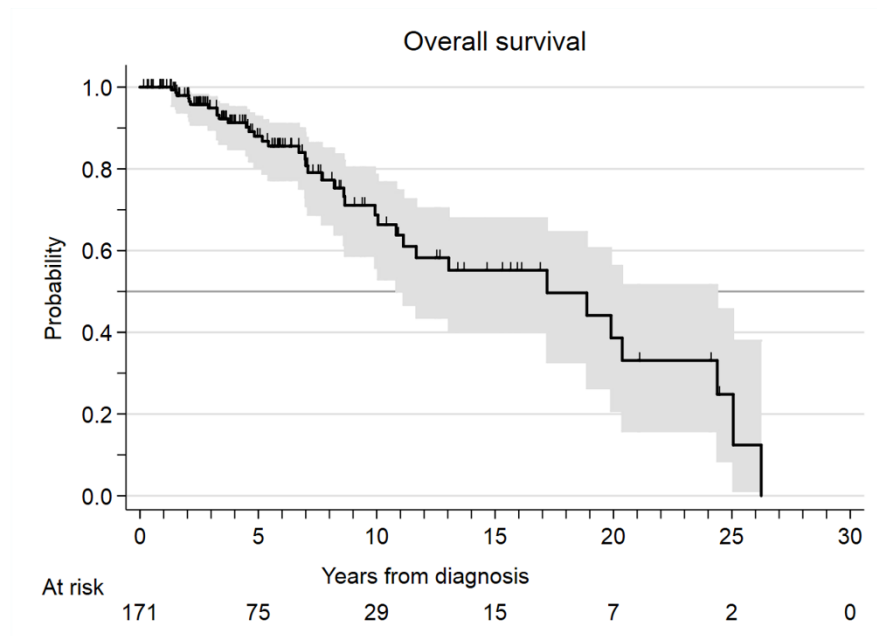

**Figure S1.** Overall survival of 171 patients with asymptomatic IgM monoclonal gammopathy.
